# Supplementary material for: Intake of dietary flavonoids in relation to bone loss among U.S. adults: a promising strategy for improving bone health
Source: Royal Society of Chemistry journal article supplement (doi:10.1039/d3fo02065g), 2023-12-08
Supplement: d3fo02065g2.pdf [file d3fo02065g2.pdf]

Supplementary Table S1. ORs and 95% CIs for bone loss, excluding participants with baseline history of taking anti-osteoporosis, corticosteroid, and estrogenic drugs.

|             | Osteopenia vs Normal    | Osteoporosis vs Normal  |
|-------------|-------------------------|-------------------------|
| Flavones    |                         |                         |
| Q1          | 1 (Reference)           | 1 (Reference)           |
| Q2          | 0.97 (0.75,1.26)        | 1.13 (0.76,1.66)        |
| Q3          | 1.11 (0.84,1.47)        | <b>0.66 (0.48,0.90)</b> |
| Q4          | 1.02 (0.76,1.36)        | <b>0.51 (0.37,0.72)</b> |
| Q5          | 0.81 (0.63,1.05)        | <b>0.41 (0.25,0.66)</b> |
| Continuous  | 0.97 (0.89,1.05)        | <b>0.72 (0.61,0.84)</b> |
| Isoflavones |                         |                         |
| Q1          | 1 (Reference)           | 1 (Reference)           |
| Q2          | 1.18 (0.81,1.71)        | 0.79 (0.51,1.22)        |
| Q3          | <b>1.36 (1.13,1.64)</b> | 0.91 (0.68,1.22)        |
| Q4          | 1.19 (0.84,1.67)        | 0.86 (0.53,1.40)        |
| Q5          | 1.23 (0.95,1.59)        | <b>0.43 (0.32,0.59)</b> |
| Continuous  | 1.09 (0.97,1.22)        | <b>0.75 (0.66,0.85)</b> |
| Flavanones  |                         |                         |
| Q1          | 1 (Reference)           | 1 (Reference)           |
| Q2          | 0.82 (0.57,1.17)        | 0.98 (0.60,1.62)        |
| Q3          | 0.99 (0.76,1.30)        | 0.94 (0.65,1.65)        |
| Q4          | 0.90 (0.66,1.23)        | 0.73 (0.46,1.14)        |
| Q5          | 0.82 (0.63,1.08)        | <b>0.68 (0.46,0.99)</b> |
| Continuous  | 0.96 (0.88,1.04)        | <b>0.85 (0.74,0.97)</b> |

Note: Fully adjusted model: age, sex, and ethnicity, education, marital status, PIR, BMI, smoking status, physical exercise, hypertension, T2DM, CKD, cancer, and history of fracture. Abbreviations: OR, odds ratio; 95% CI, 95% confidence interval. Anti-osteoporosis drugs: Etidronate; Alendronate; Risedronate; Ibandronate; Zoledronic acid; Alendronate; Risedronate; Denosumab. Corticosteroid drugs: prednisone; cortisone. Estrogenic drugs: Conjugated estrogens Estrone; Ethinyl estradiol; Estradiol; Esterified estrogens; Estropipate estriol. Data with *P* values below 0.05 are presented in bold type.

Supplementary Table S2. ORs and 95% CIs for bone loss, additionally adjusting for menopausal status.

|             | Osteopenia vs Normal    | Osteoporosis vs Normal  |
|-------------|-------------------------|-------------------------|
| Flavones    |                         |                         |
| Q1          | 1 (Reference)           | 1 (Reference)           |
| Q2          | 1.01 (0.81,1.27)        | 1.38 (0.94,2.02)        |
| Q3          | 1.10 (0.86,1.41)        | <b>0.64 (0.46,0.89)</b> |
| Q4          | 1.01 (0.77,1.34)        | <b>0.53 (0.37,0.74)</b> |
| Q5          | 0.81 (0.61,1.07)        | <b>0.45 (0.31,0.65)</b> |
| Continuous  | 0.96 (0.88,1.04)        | <b>0.75 (0.67,0.84)</b> |
| Isoflavones |                         |                         |
| Q1          | 1 (Reference)           | 1 (Reference)           |
| Q2          | 1.15 (0.83,1.60)        | 0.75 (0.49,1.15)        |
| Q3          | <b>1.31 (1.06,1.60)</b> | 0.91 (0.67,1.24)        |
| Q4          | 1.13 (0.81,1.59)        | 0.94 (0.62,1.41)        |
| Q5          | 1.18 (0.93,1.49)        | <b>0.50 (0.34,0.72)</b> |
| Continuous  | 1.07 (0.97,1.19)        | <b>0.79 (0.69,0.92)</b> |
| Flavanones  |                         |                         |
| Q1          | 1 (Reference)           | 1 (Reference)           |
| Q2          | 0.90 (0.67,1.21)        | 1.07 (0.68,1.67)        |
| Q3          | 1.01 (0.80,1.28)        | 0.94 (0.63,1.39)        |
| Q4          | 0.95 (0.71,1.27)        | 0.69 (0.44,1.08)        |
| Q5          | 0.84 (0.67,1.05)        | <b>0.67 (0.46,0.99)</b> |
| Continuous  | 0.96 (0.90,1.03)        | <b>0.84 (0.73,0.96)</b> |

Note: Fully adjusted model: age, sex, and ethnicity, education, marital status, PIR, BMI, smoking status, physical exercise, hypertension, T2DM, CKD, cancer, and history of fracture. This multivariable model was additionally adjusted for menopausal status. Abbreviations: OR, odds ratio; 95% CI, 95% confidence interval. Data with *P* values below 0.05 are presented in bold type.

Supplementary Table S3. ORs and 95% CIs for bone loss, additionally adjusting for dietary supplements (vitamin D and calcium).

|             | Osteopenia vs Normal    | Osteoporosis vs Normal  |
|-------------|-------------------------|-------------------------|
| Flavones    |                         |                         |
| Q1          | 1 (Reference)           | 1 (Reference)           |
| Q2          | 0.96 (0.76,1.20)        | 1.25 (0.86,1.81)        |
| Q3          | 1.10 (0.86,1.40)        | <b>0.63 (0.46,0.86)</b> |
| Q4          | 1.01 (0.77,1.31)        | <b>0.52 (0.38,0.70)</b> |
| Q5          | 0.81 (0.62,1.05)        | <b>0.46 (0.32,0.64)</b> |
| Continuous  | 0.97 (0.89,1.05)        | <b>0.76 (0.68,0.85)</b> |
| Isoflavones |                         |                         |
| Q1          | 1 (Reference)           | 1 (Reference)           |
| Q2          | 1.16 (0.84,1.60)        | 0.78 (0.52,1.16)        |
| Q3          | <b>1.31 (1.07,1.60)</b> | 0.92 (0.67,1.26)        |
| Q4          | 1.13 (0.81,1.56)        | 0.86 (0.58,1.29)        |
| Q5          | 1.23 (0.98,1.54)        | <b>0.52 (0.36,0.75)</b> |
| Continuous  | 1.08 (0.98,1.20)        | <b>0.79 (0.69,0.91)</b> |
| Flavanones  |                         |                         |
| Q1          | 1 (Reference)           | 1 (Reference)           |
| Q2          | 0.89 (0.66,1.20)        | 1.00 (0.64,1.56)        |
| Q3          | 1.01 (0.80,1.28)        | 0.93 (0.63,1.38)        |
| Q4          | 0.94 (0.71,1.24)        | 0.65 (0.42,1.02)        |
| Q5          | 0.84 (0.68,1.05)        | <b>0.65 (0.44,0.97)</b> |
| Continuous  | 0.96 (0.90,1.03)        | <b>0.83 (0.72,0.95)</b> |

Note: Fully adjusted model: age, sex, and ethnicity, education, marital status, PIR, BMI, smoking status, physical exercise, hypertension, T2DM, CKD, cancer, and history of fracture. This multivariable model was additionally adjusted for vitamin D and calcium supplements. Abbreviations: OR, odds ratio; 95% CI, 95% confidence interval. Data with *P* values below 0.05 are presented in bold type.

Supplementary Table S4. E-values for the effect of three flavonoid subclasses on bone loss (and its upper limit of 95% CI) in fully adjusted model.

| E-Value for OR Estimate | E-Value for upper limit of 95%CI | Variable    | Level      | Group                  | OR (95% CI)      |
|-------------------------|----------------------------------|-------------|------------|------------------------|------------------|
| 2.72                    | 1.67                             | Flavones    | Q3 vs Q1   | Osteoporosis vs Normal | 0.60 (0.43,0.84) |
| 3.41                    | 2.21                             | Flavones    | Q4 vs Q1   | Osteoporosis vs Normal | 0.50 (0.36,0.70) |
| 3.97                    | 2.50                             | Flavones    | Q5 vs Q1   | Osteoporosis vs Normal | 0.44 (0.30,0.64) |
| 2.00                    | 1.67                             | Flavones    | Continuous | Osteoporosis vs Normal | 0.75 (0.67,0.84) |
| 3.18                    | 1.92                             | Isoflavones | Q5 vs Q1   | Osteoporosis vs Normal | 0.53 (0.37,0.77) |
| 1.77                    | 1.36                             | Isoflavones | Continuous | Osteoporosis vs Normal | 0.81 (0.70,0.93) |
| 2.40                    | 1.21                             | Flavanones  | Q5 vs Q1   | Osteoporosis vs Normal | 0.66 (0.45,0.97) |
| 1.70                    | 1.29                             | Flavanones  | Continuous | Osteoporosis vs Normal | 0.83 (0.72,0.95) |

Note: Fully adjusted model: age, sex, and ethnicity, education, marital status, PIR, BMI, smoking status, physical exercise, hypertension, T2DM, CKD, cancer, and history of fracture. Abbreviations: OR, odds ratio; 95% CI, 95% confidence interval.
